# Supplementary material for: Metal-ion-coordinated cross-linked quasi-solid-state polymer electrolyte for a high energy-density and long-life Prussian blue analogs cathode
Source: Royal Society of Chemistry journal article supplement (doi:10.1039/d4ta04988h), 2024-01-01
Supplement: d4ta04988h1.pdf [file d4ta04988h1.pdf]

**Metal-ions-coordinated Cross-linked Quasi-solid-state Polymer Electrolyte  
towards High Energy-density and Long-life Prussian Blue Analogs**

**Cathode**

*Xinyu Wang<sup>a,b</sup>, Cheng Yang<sup>a\*</sup>, Ning Jiang<sup>a,b</sup>, Yichao Wang<sup>a,b</sup>, Shouyu Sun<sup>a,b</sup>, Yu Liu<sup>a\*</sup>*

<sup>a</sup>Shanghai Institute of Ceramics, Chinese Academy of Sciences  
Shanghai 200050, China

<sup>b</sup>University of Chinese Academy of Sciences  
Beijing 100049, China

\*Email: yangcheng@mail.sic.ac.cn; yuliu@mail.sic.ac.cn

## Supplementary materials

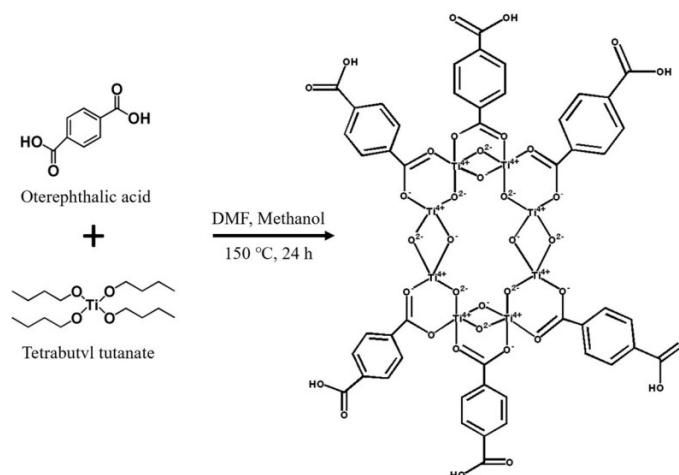

**Figure S1** The synthetic route of MLI-125(Ti) by the solvothermal method<sup>1</sup>.

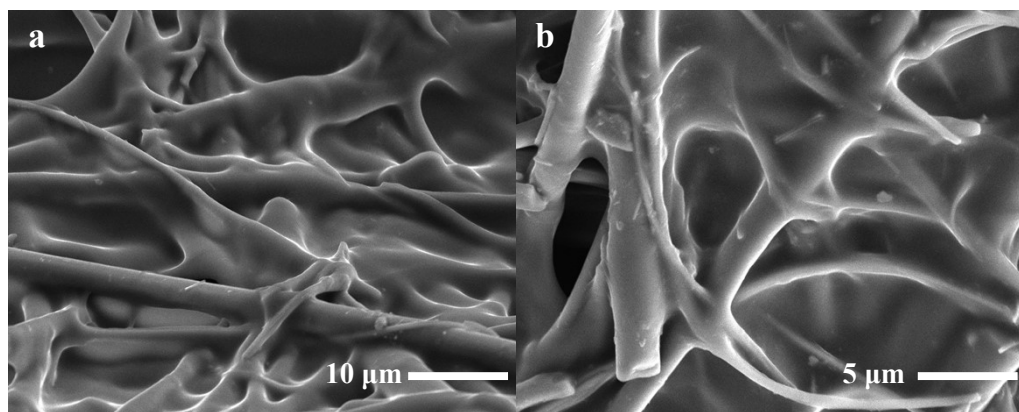

**Figure S2** The SEM images of the cross-section of Ti@GPE.

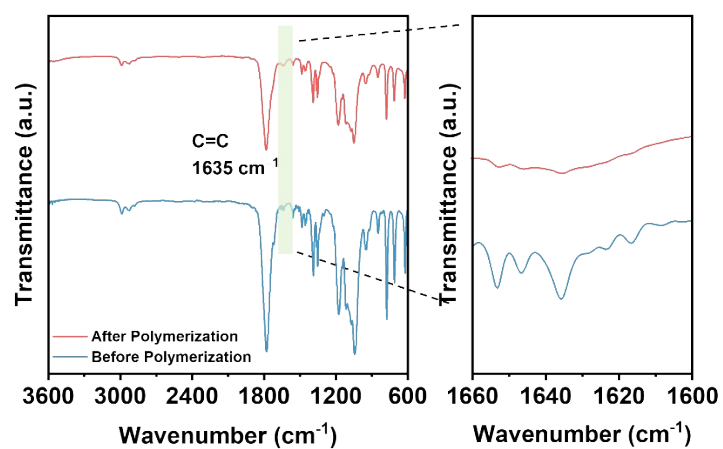

**Figure S3** The FT-IR spectra of GPE polymer electrolyte before and after thermal polymerization.

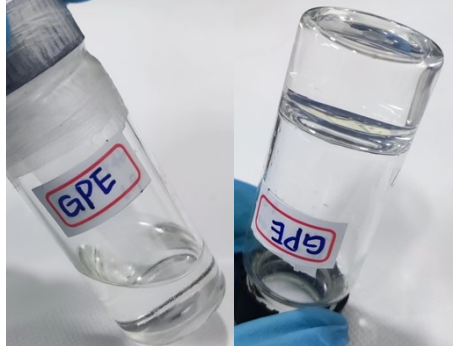

**Figure S4** The optical photographs of the precursor solution before (a) and after (b) thermal polymerization.

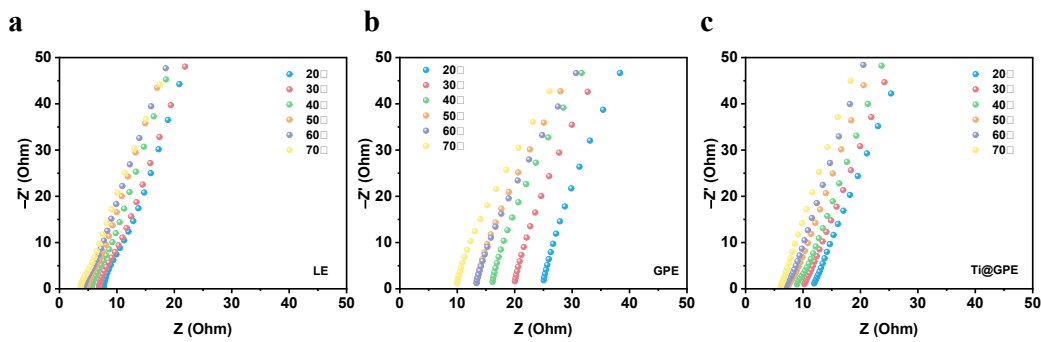

**Figure S5** The ionic conductivity of different electrolytes at different temperatures (from 293 K to 343 K).

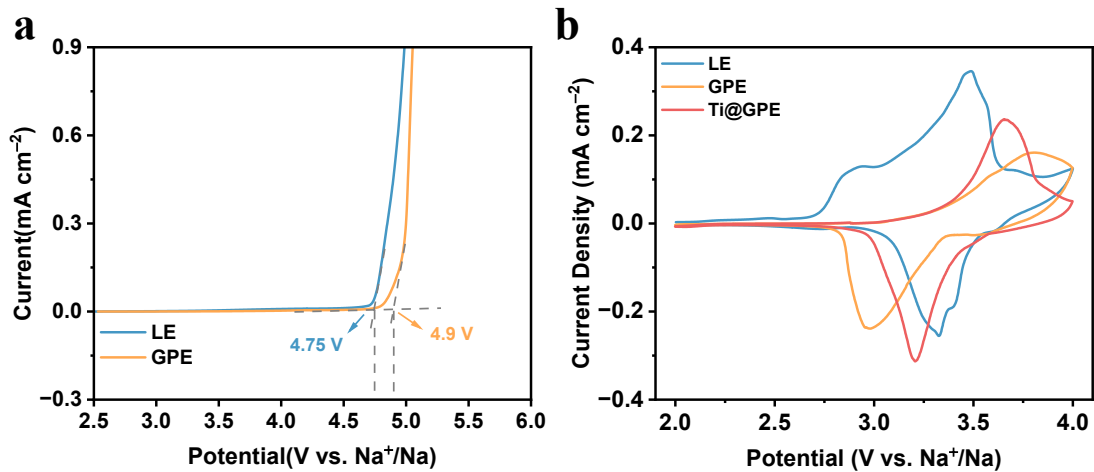

**Figure S6** The LSV and CV tests at 0.2 mV/s of different electrolytes at room temperature.

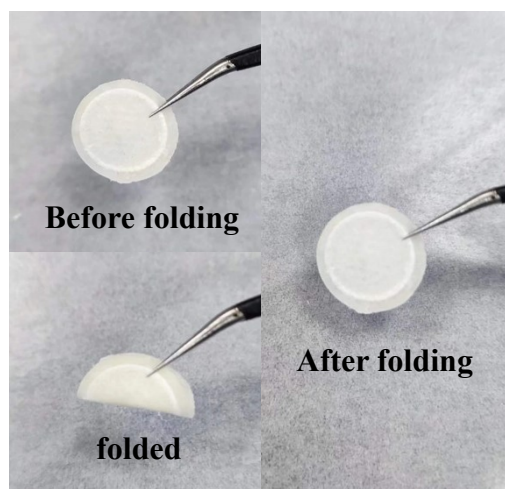

**Figure S7** The optional photographs of the liquid precursor solution loaded on glass fibers (precursor solution@GF) after polymerization.

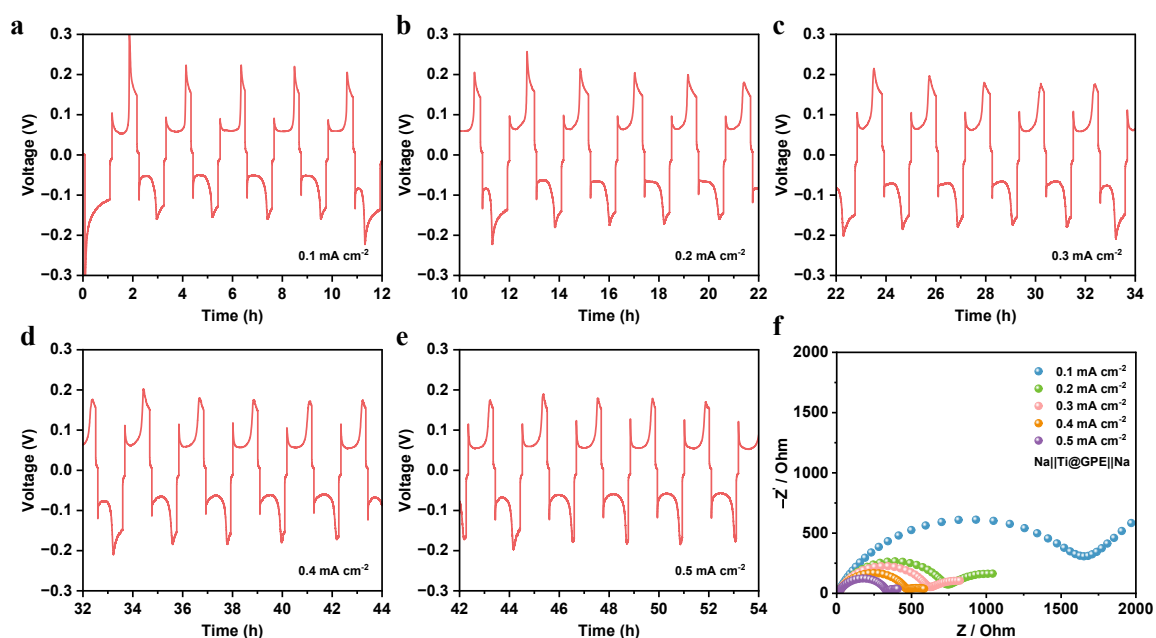

**Figure S8** The peak magnification diagrams of Na||Ti@GPE||Na symmetric cells under a) 0.1、 b) 0.2、 c) 0.3、 d) 0.4、 e) 0.5 mA cm<sup>-2</sup> and d) the corresponding impedance of the symmetric battery under different current densities.

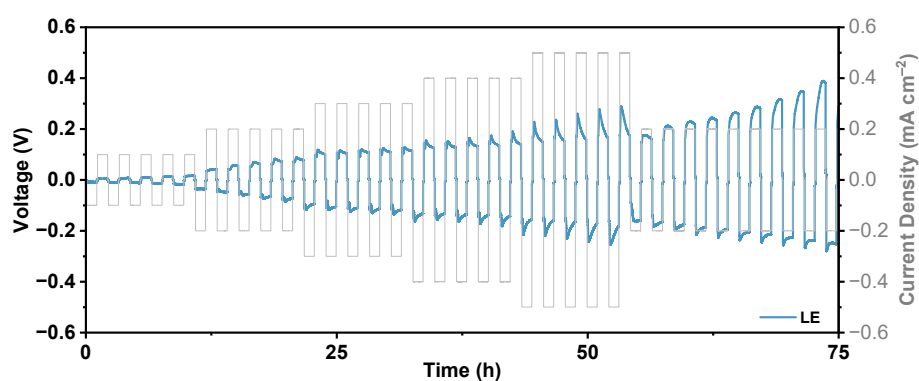

**Figure S9** The variable current cycling tests of Na||LE||Na symmetric battery.

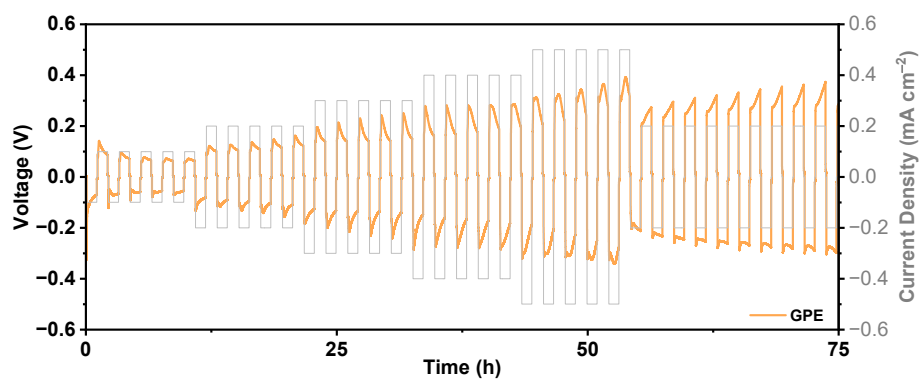

**Figure S10** The variable current cycling tests of Na||GPE||Na symmetric battery.

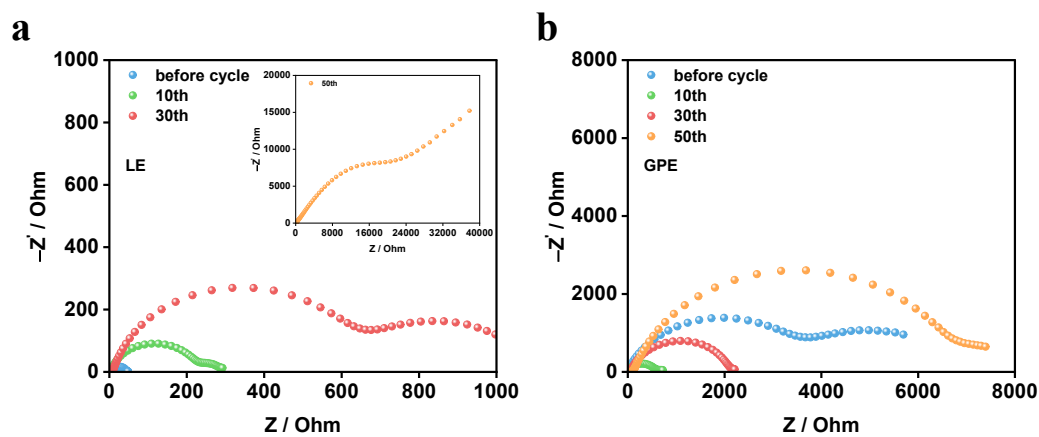

**Figure S11** The electrochemical impedance spectroscopy (EIS) of Na||LE||Na (a) and Na||GPE||Na (b) symmetric batteries after various cycling times.

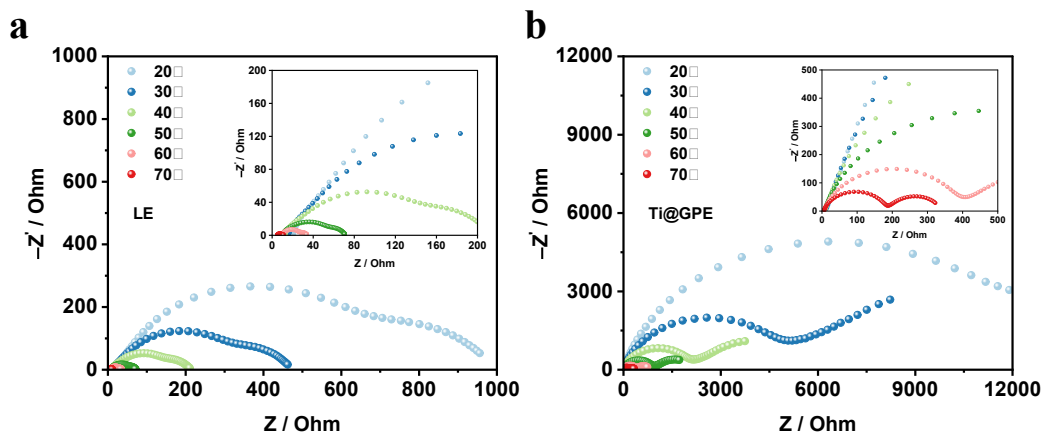

**Figure S12** The EIS curves of Na||LE||Na (a) and Na||Ti@GPE||Na (b) at different temperatures (from 293 K to 343K).

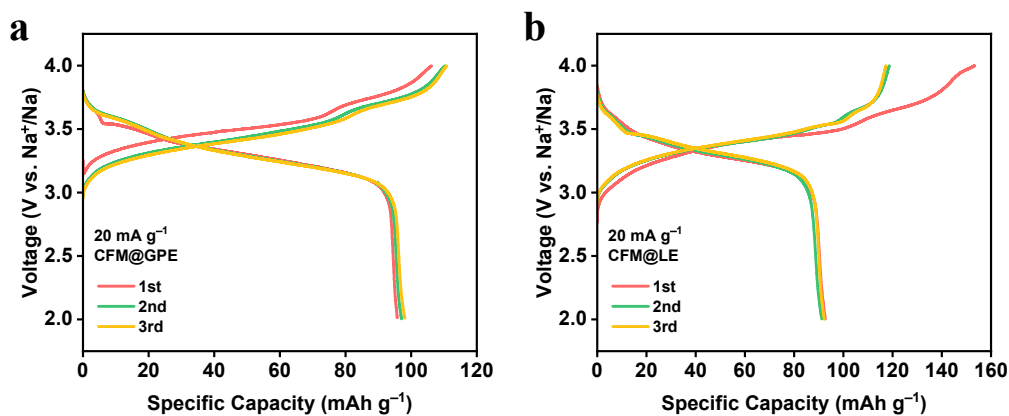

**Figure S13** The initial three-cycle charge-discharge curves of CFM-PBA||Na full batteries with GPE (a) and LE (b) electrolyte at 20 mA g<sup>-1</sup>.

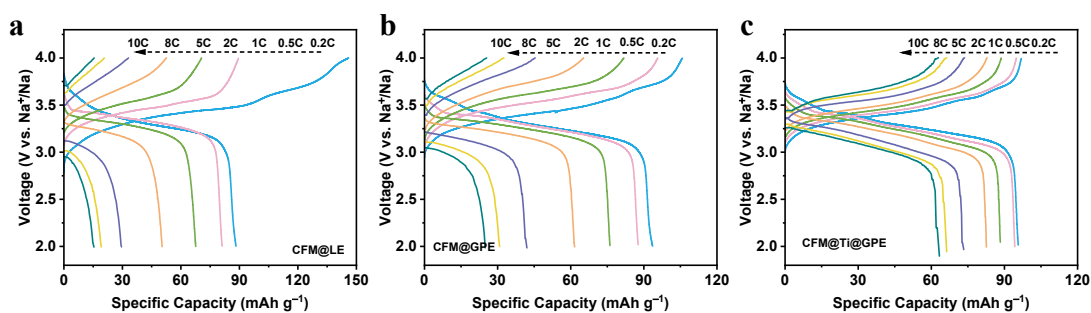

**Figure S14** The charge-discharge curves of LE (a), GPE(b) and Ti@GPE (c) electrolytes at different current density.

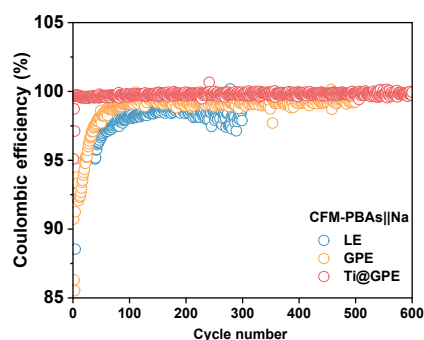

**Figure S15** The coulombic efficiency of CFM-PBAs||Na batteries in different electrolytes with charging voltage of 4 V at 100 mA g<sup>-1</sup>.

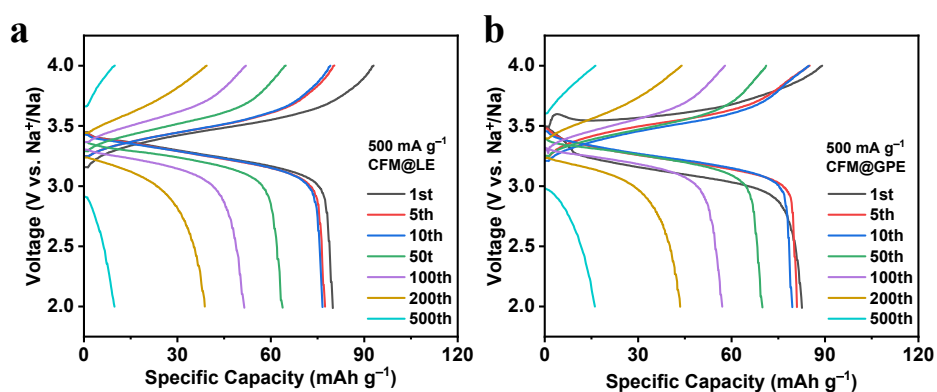

**Figure S16** The charge-discharge curves of CFM-PBAs||Na full cells with different electrolyte systems at a current density of 5C, a for LE electrolyte and b for GPE electrolyte at 5C.

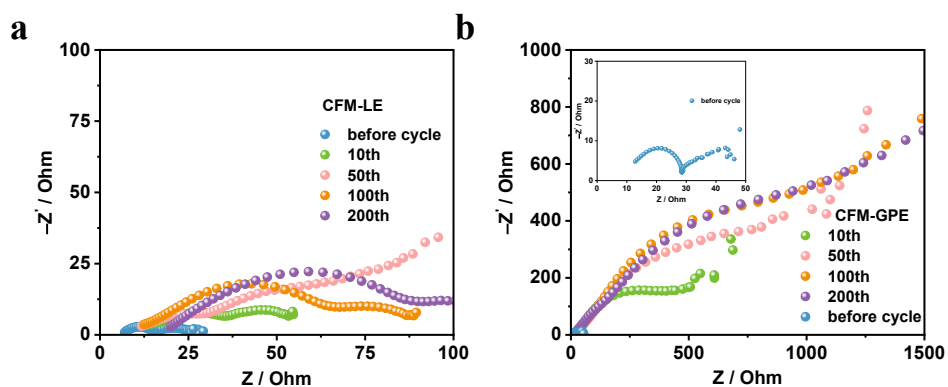

**Figure S17** The electrochemical impedance spectroscopy of CFM-PBAs||Na full batteries in LE (a) and GPE (b) electrolytes.

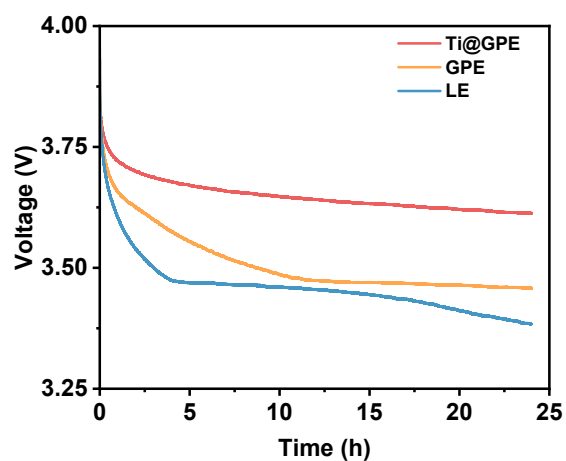

**Figure S18** The static discharging curves of CFM-PBAs||Na charged to 4.0 V for 24 h.

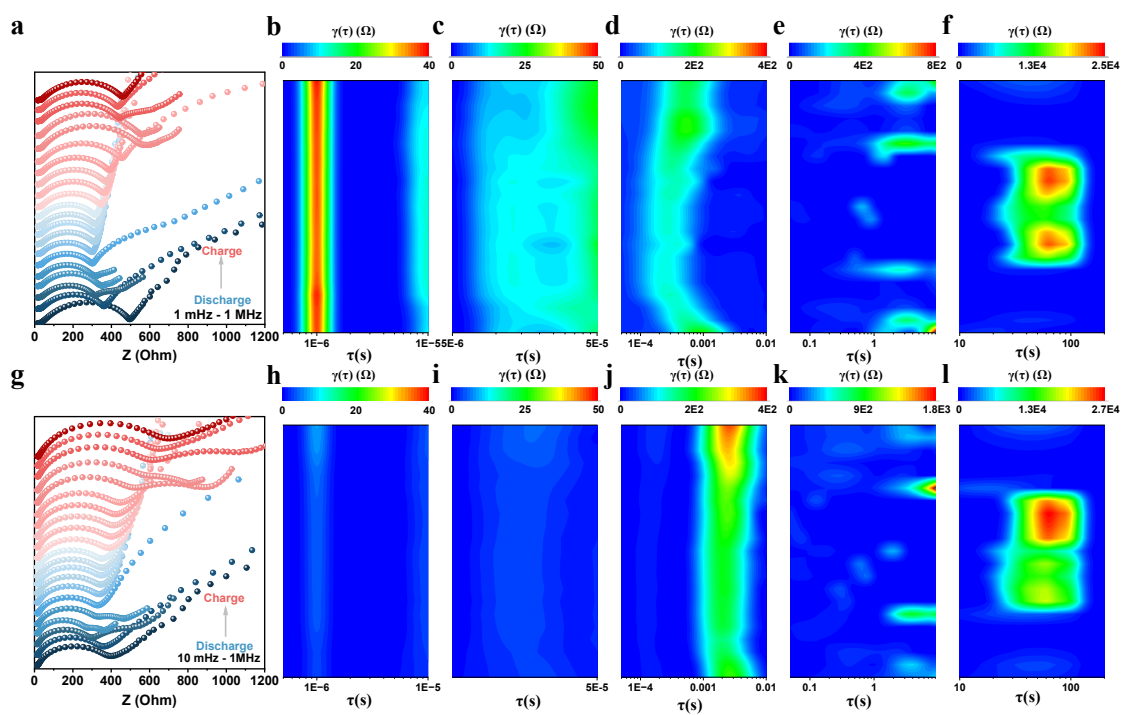

**Figure S19** In-situ EIS during the first cycle of a) GPE and g) LE electrolyte. The total timescale distributions of different kinetics processes of b-f) GPE and h-l) LE electrolyte.



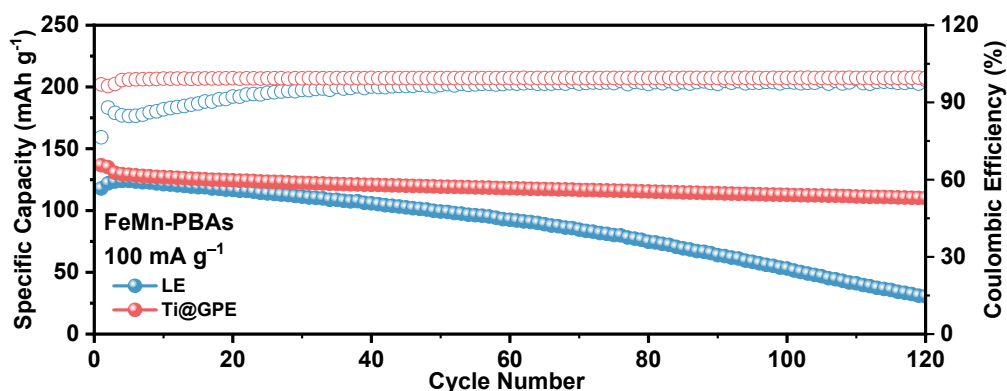

**Figure S20** The cycling performance of FM-PBAs||Na full batteries in LE (a) and Ti@GPE (b) electrolytes at current density of 100 mA g<sup>-1</sup>.

**Table S1** The ionic conductivity and tensile performance comparison of different quasi-solid-state polymer electrolyte

| Electrolyte              | Ionic conductivity<br>*10 <sup>-4</sup> S cm <sup>-1</sup> | Tensile strength<br>MPa | Source    |
|--------------------------|------------------------------------------------------------|-------------------------|-----------|
| ANI-82                   | 4.3                                                        | 10.1                    | 2         |
| v-NBR/TAC/IL             | 2.2                                                        | 0.52                    | 3         |
| GDT@GF                   | 1.19                                                       | 8.7                     | 4         |
| PISSE60%                 | 3.03                                                       | 0.811                   | 5         |
| F-Mo <sub>2</sub> C-LCPP | 5.57                                                       | 16.375                  | 6         |
| CNF/PEG                  | 6.1                                                        | 9.5                     | 7         |
| Ti@GPE                   | 38.5                                                       | 13.85                   | This work |

**Table S2** Relevant parameters for porosity in quasi-solid polymer electrolytes.

| QSPE                           | Ti@GPE  | GPE     |
|--------------------------------|---------|---------|
| Thickness (mm)                 | 0.562   | 0.610   |
| Mass before QSPE treatment (g) | 0.7118  | 0.07225 |
| Mass after QSPE treatment (g)  | 0.02347 | 0.02013 |
| Content of plasticizer (%)     | 67      | 64      |
| Porosity (%)                   | 17.9    | 21.4    |

**Table S3** Comparison of electrochemical performances of the as-designed Ti@GPE with other reported quasi-solid-state polymer electrolytes in Na||Na symmetric batteries.

| Quasi-solid-state polymer electrolyte | Current density (mA cm <sup>-2</sup> ) | Capacity (mAh cm <sup>-2</sup> ) | Duration (h) | Reference |
|---------------------------------------|----------------------------------------|----------------------------------|--------------|-----------|
| PLM@LE                                | 0.6                                    | /                                | 300          | 8         |
| ATFPE                                 | 0.1                                    | 0.1                              | 600          | 9         |
| PEGMEM-co-SSS@ZIF-8                   | 0.5                                    | /                                | 230          | 10        |
| PDA@PU-GPE                            | 1                                      | 0.5                              | 450          | 11        |
| 30%NZSP-PAN                           | 0.1                                    | /                                | 400          | 12        |
| PFSA-Na                               | 0.5                                    | /                                | 300          | 13        |
| PSB <sub>60</sub> -GPE                | 0.5                                    | /                                | 800          | 14        |
| ANI-82                                | 0.4                                    | /                                | 350          | 2         |
| Ti@GPE                                | 0.1                                    | 0.1                              | 800          | This work |

**Table S4** Comparison of ionic conductivity and electrochemical performances of the as-designed Ti@GPE with other reported quasi-solid-state polymer electrolytes (use PBAs as the cathode).

| Quasi-solid-state polymer electrolyte | Ionic conductivity (S cm <sup>-1</sup> ) | Discharge capacity at 0.2 C (mAh g <sup>-1</sup> ) | Cycle rate | Cycles | Capacity and retention | Reference |
|---------------------------------------|------------------------------------------|----------------------------------------------------|------------|--------|------------------------|-----------|
| 30%NZSP-PAN                           | 1.79*10 <sup>-5</sup>                    | 112                                                | 0.1C       | 200    | 90<br>93.71%           | 12        |
| PEO20-KTFSI1                          | 1.30*10 <sup>-6</sup>                    | 108                                                | 1/15 C     | 50     | 97<br>90%              | 15        |
| PVDF-HFP/IL/PDA                       | 1.09*10 <sup>-3</sup>                    | 113.4                                              | 0.2 C      | 100    | 99.4<br>87.7           | 16        |

|         |                       |      |      |      |             |           |
|---------|-----------------------|------|------|------|-------------|-----------|
| PFSA-Na | $1.78 \times 10^{-4}$ | ~130 | 1 C  | 1100 | 95<br>84.6% | 13        |
| ZHPE-50 | $8 \times 10^{-2}$    | 65   | 10 C | 1000 | 15<br>75%   | 17        |
| Ti@GPE  | $3.85 \times 10^{-3}$ | 92   | 5C   | 2000 | 72<br>78%   | This work |

## References

1. Q. Liu, L. Yang, Z. Mei, Q. An, K. Zeng, W. Huang, S. Wang, Y. Sun and H. Guo, *Energy Environ. Sci.*, 2024, **17**, 780-790.
2. X. Dong, Y. Zhang, Z. You, Y. Chen, X. Wu and Z. Wen, *Adv. Funct. Mater.*, 2024, **n/a**, 2405931.
3. D. Zhang, Y. Shi, J. An, S. Yang and B. Li, *J. Mater. Chem. A*, 2022, **10**, 23095-23102.
4. Y. Sun, M. Pan, Y. Wang, A. Hu, Q. Zhou, D. Zhang, S. Zhang, Y. Zhao, Y. Wang, S. Chen, M. Zhou, Y. Chen, J. Yang, J. Wang and Y. NuLi, *Angew. Chem. Int. Ed.*, 2024, **n/a**, e202406585.
5. J. Yang, R. Li, P. Zhang, J. Zhang, J. Meng, L. Li, Z. Li and X. Pu, *Energy Storage Mater.*, 2024, **64**, 103088.
6. Y. Shan, L. Li, X. Chen, S. Fan, H. Yang and Y. Jiang, *ACS Energy Lett.*, 2022, **7**, 2289-2296.
7. Z. Wang, P. Heasman, J. Rostami, T. Bensefelt, M. Linares, H. Li, A. Iakunkov, F. Sellman, R. Östmans, M. M. Hamed, I. Zozoulenko and L. Wågberg, *Adv. Funct. Mater.*, 2023, **33**, 2212806.
8. G. Zhang, J. Shu, L. Xu, X. Cai, W. Zou, L. Du, S. Hu and L. Mai, *Nano-Micro Letters*, 2021, **13**, 105.
9. J. Guo, F. Feng, S. Zhao, R. Wang, M. Yang, Z. Shi, Y. Ren, Z. Ma, S. Chen and T. Liu, *Small*, 2023, **19**, 2206740.
10. J. Zhang, Y. Wang, Q. Xia, X. Li, B. Liu, T. Hu, M. Tebyetekerwa, S. Hu, R. Knibbe and S. Chou, *Angew. Chem. Int. Ed.*, 2024, **63**, e202318822.
11. Y. Zhang, H. Yuan, L. Shi, H. Lai, X. Wu and Z. Wen, *ACS Sustainable Chemistry & Engineering*, 2024, **12**, 3142-3152.
12. T. Wang, M. Zhang, K. Zhou, H. Wang, A. Shao, L. Hou, Z. Wang, X. Tang, M. Bai, S. Li and Y. Ma, *Adv. Funct. Mater.*, 2023, **33**, 2215117.

13. G. Du, M. Tao, J. Li, T. Yang, W. Gao, J. Deng, Y. Qi, S.-J. Bao and M. Xu, *Adv. Energy Mater.*, 2020, **10**, 1903351.
14. H. Lai, Y. Lu, W. Zha, Y. Hu, Y. Zhang, X. Wu and Z. Wen, *Energy Storage Mater.*, 2023, **54**, 478-487.
15. A. D. Khudyshkina, P. A. Morozova, A. J. Butzelaar, M. Hoffmann, M. Wilhelm, P. Theato, S. S. Fedotov and F. Jeschull, *ACS Applied Polymer Materials*, 2022, **4**, 2734-2746.
16. M. Xie, S. Li, Y. Huang, Z. Wang, Y. Jiang, M. Wang, F. Wu and R. Chen, *ChemElectroChem*, 2019, **6**, 2423-2429.
17. S. Dilwale, P. P. Puthiyaveetil, A. Babu and S. Kurungot, *Small*, 2024, **n/a**, 2311923.
